# Supplementary material
Source: PubMed Central journal article supplement (PMC3679487)
Supplement: supp_126.11.2446_JCS119214.pdf [file supp_126.11.2446_JCS119214.pdf]

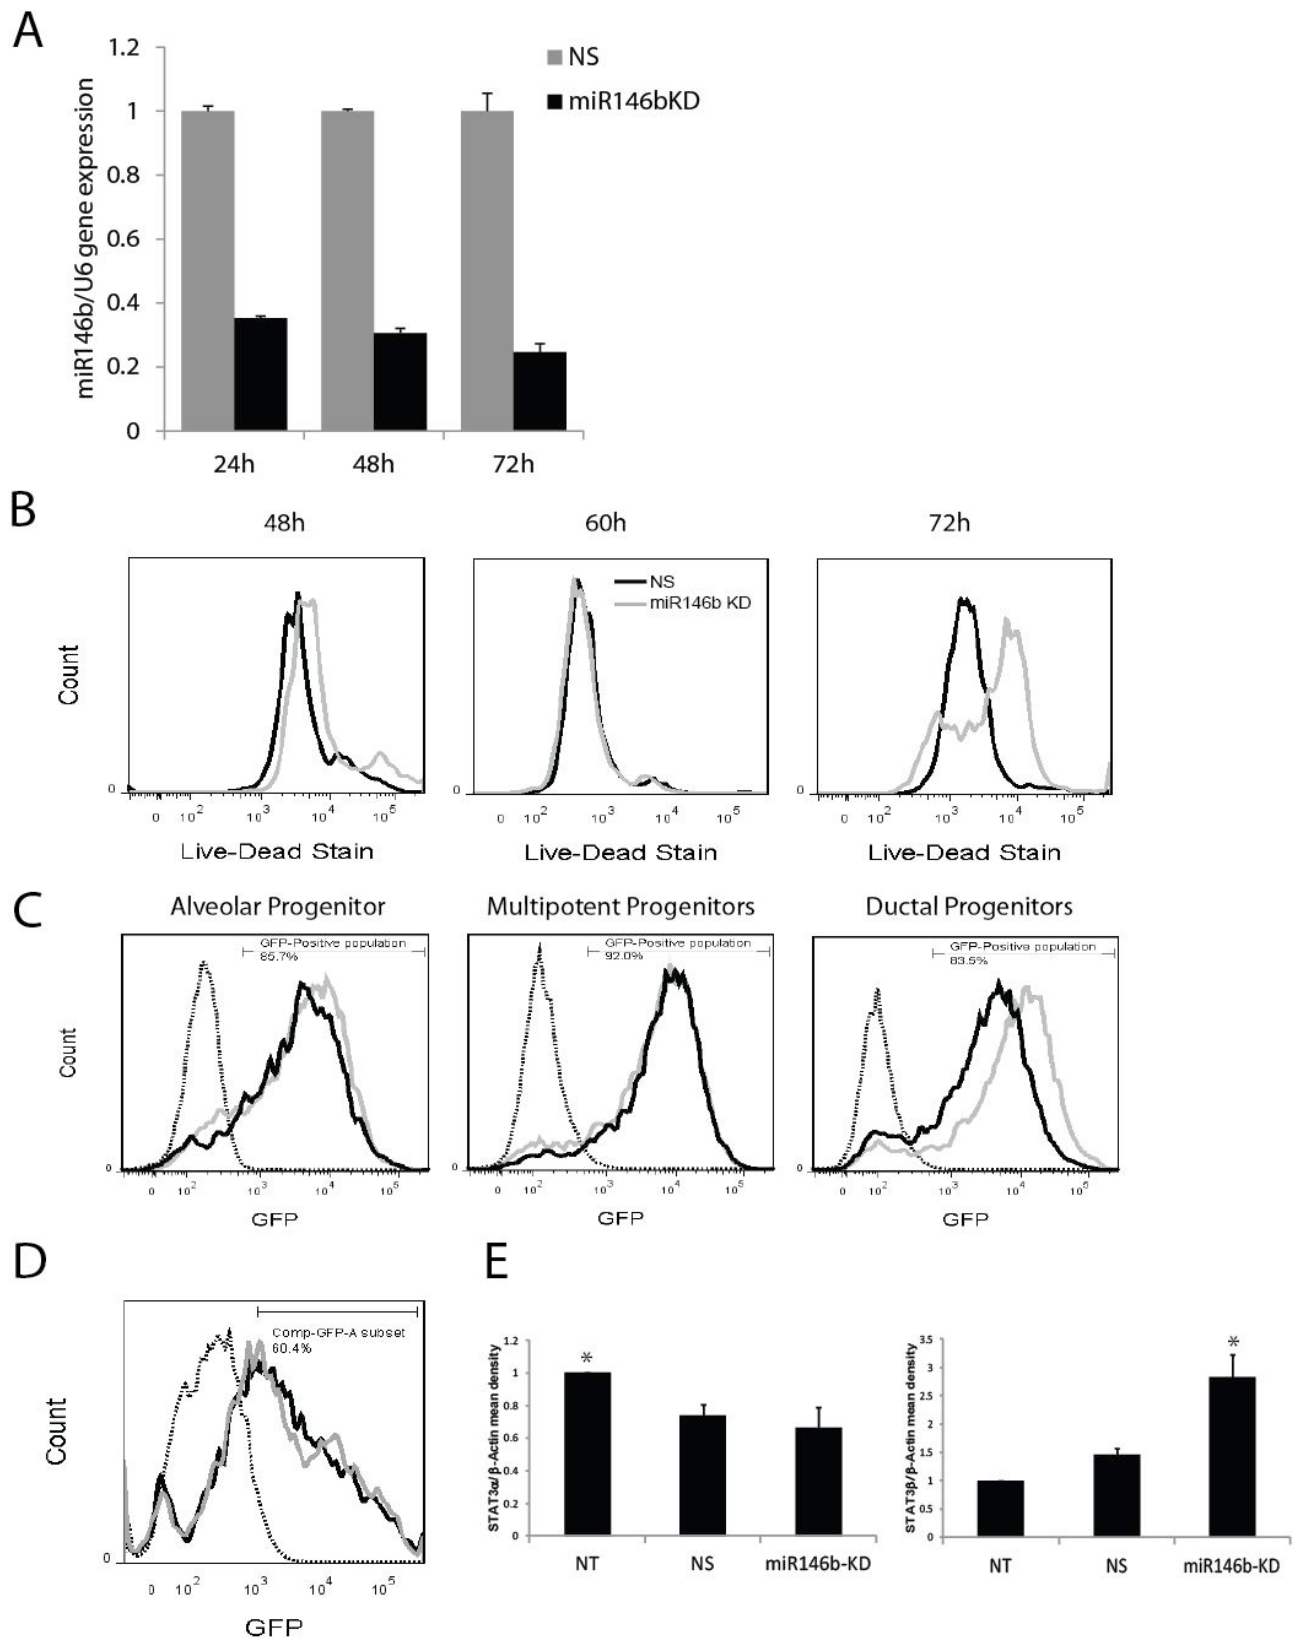

**Fig. S1.** (A) RT-PCR of miR-146b in CD-alveolar progenitor cell line at 24, 48 and 72 hours after transfection. Data are presented as the mean  $\pm$  s.e.m. ( $n=3$ ). (B) Representative histogram of flow cytometry analysis for cells stained with the LIVE/DEAD® Fixable Dead Cell Staining Kit. Live-dead analysis was done in the alveolar progenitor cell line at 48, 60 and 72 hours post-transfection. (C,D) Representative histograms of flow cytometry analysis for cells transfected with the GFP-labeled LNA inhibitors and their controls, showing the percentage of GFP positive cells in the CD-derived distinct progenitor cell lines (C) and in the PMECs (D). (E) Representative bar graphs of densitometry for STAT3 $\alpha$  and STAT3 $\beta$  levels normalized to  $\beta$ -actin in CD-derived alveolar progenitor cells ( $n=4$ , \*indicates  $P<0.05$  compared to other cells). Data are presented as the mean  $\pm$  s.e.m.
